# Supplementary material for: Regulatory mechanisms involved in muscle and bone remodeling during refeeding in gilthead sea bream
Source: PubMed Central journal article supplement (PMC6957526; doi:10.1038/s41598-019-57013-6), 2020-01-13
Supplement: 41598_2019_57013_MOESM1_ESM.pdf [file 41598_2019_57013_MOESM1_ESM.pdf]

# **Regulatory mechanisms involved in muscle and bone remodeling during refeeding in gilthead sea bream**

Lavajoo, F.<sup>§1</sup>, Perelló-Amorós, M.<sup>§</sup>, Vélez, E.J.<sup>2</sup>, Sánchez-Moya, A., Balbuena-Pecino, S., Riera-Heredia, N., Fernández-Borràs, J., Blasco, J., Navarro, I., Capilla, E.<sup>¥</sup> and Gutiérrez J.<sup>¥\*</sup>

Department of Cell Biology, Physiology and Immunology, Faculty of Biology, University of Barcelona, Barcelona, Spain

<sup>§</sup> Equal contribution; <sup>¥</sup> Equal contribution

<sup>1</sup>Present address: Department of Marine Biology, Faculty of Marine Science and Technology, University of Hormozgan, I. R. Iran

<sup>2</sup>Present address: Department of Veterinary Biomedical Sciences, Western College of Veterinary Medicine, University of Saskatchewan, Saskatoon, Saskatchewan S7N 5B4, Canada

\*Corresponding author: Joaquim Gutiérrez

Department of Cell Biology, Physiology and Immunology, Faculty of Biology, University of Barcelona, Av. Diagonal 643, 08028, Barcelona, Spain. Tel: (+34) 934021532, E-mail: [jgutierrez@ub.edu](mailto:jgutierrez@ub.edu)

**Supplementary Table 1:** Sequences, annealing temperatures (Ta) and GenBank accession numbers of the primers used for *Sparus aurata* real-time quantitative PCR.

|                              | Gene           | Sequences                                                          | Ta (°C) | Accession Number |
|------------------------------|----------------|--------------------------------------------------------------------|---------|------------------|
| <i>GH/IGF family</i>         | <i>igf1a</i>   | F: AGGACAGCACAGCAGCCAGACAAGAC<br>R: TTCGGACCATTGTTAGCCTCCTCTCTG    | 60      | AY996779         |
|                              | <i>igf1ab</i>  | F: AGTCATTCATCCTTCAAGGAAGTGCATCC<br>R: TTCGGACCATTGTTAGCCTCCTCTCTG | 60      | EF688015         |
|                              | <i>igf1abc</i> | F: ACAGAATGTAGGGACGGAGCGAATGGAC<br>R: TTCGGACCATTGTTAGCCTCCTCTCTG  | 60      | EF688016         |
|                              | <i>igf2</i>    | F: TGGGATCGTAGAGGAGTGTGTG<br>R: CTGTAGAGAGGTGGCCGACA               | 60      | AY996778         |
|                              | <i>igf1ra</i>  | F: AGCATCAAAGACGAACTGG<br>R: CTCCTCGCTGTAGAAGAAGC                  | 60      | KT156846         |
|                              | <i>igf1rb</i>  | F: GCTAATGCGAATGTGTTGG<br>R: CGTCCTTTATGCTGCTGATG                  | 55      | KT156847         |
|                              | <i>igfbp1</i>  | F: AGTGCGAGTCTCTCTGGAT<br>R: TCTCTTTAAGGGCACTCGGC                  | 60      | KM522771         |
|                              | <i>igfbp4</i>  | F: TCCACAAACCAGAGAAGCAA<br>R: GGGTATGGGGATTGTGAAGA                 | 60      | F5T95CD02JMZ9K   |
|                              | <i>igfbp5b</i> | F: TTTCTCTCTCGGTGTGC<br>R: TCAAGTATCGGCTCCAG                       | 60      | AM963285         |
|                              | <i>ghr1</i>    | F: ACCTGTCAGCCACCACATGA<br>R: TCGTGCAGATCTGGGTCGTA                 | 60      | AF438176         |
|                              | <i>ghr2</i>    | F: GAGTGAACCCGGCCTGACAG<br>R: GCGGTGGTATCTGATTCATGGT               | 60      | AY573601         |
| <i>Signaling</i>             | <i>akt</i>     | F: GCTCACCCCACTCTTCAGAC<br>R: AAATTGGGAAATGTGCTTGC                 | 60      | AY996779         |
|                              | <i>tor</i>     | F: CAGACTGACGAGGATGCTGA<br>R: AGTTGAGCAGCGGGTCATAG                 | 60      | EF688015         |
|                              | <i>70s6k</i>   | F: GCACCAGAAAGGCATCATCT<br>R: AAGGTGTGGTCACTGTTC                   | 60      | EF688016         |
|                              | <i>4ebp1</i>   | F: CCAACCTGCGACTCATCTCT<br>R: GTTCCTCTCATCTCCACACA                 | 60      | KM522771         |
|                              | <i>foxo3</i>   | F: CAGCAGCCTGGAGTGTGATA<br>R: CCAGCTCTGAGAGGTCTGCT                 | 60      |                  |
| <i>Muscle growth-related</i> | <i>pax7</i>    | F: ATGAACACTGTCGGCAACG<br>R: AGGCTGTCCACACTCTTGATG                 | 64      | JN034418         |
|                              | <i>pcna</i>    | F: TGTTTGAGGCACGTCTGGTT<br>R: TGGCTAGGTTTCTGTCCG                   | 60      | AY550963.1       |
|                              | <i>myf5</i>    | F: CTACGAGAGCAGGTGGAGAACT<br>R: TGTCTTATCGCCCAAAGTGTC              | 64      | JN034420         |
|                              | <i>myod1</i>   | F: TTTGAGGACCTGGACCC<br>R: CTCTGCGTGGTGATGGA                       | 60      | AF478568.1       |
|                              | <i>myod2</i>   | F: CACTACAGCGGGGATTCAGAC<br>R: CGTTTGCTTCTCCTGGACTC                | 60      | AF478569         |
|                              | <i>myog</i>    | F: CAGAGGCTGCCAAGGTGGAG<br>R: CAGGTGCTGCCGAAGTGGGCTCG              | 68      | EF462191         |
|                              | <i>mrf4</i>    | F: CATCCACAGCTTTAAAGGCA<br>R: GAGGACGCCGAAGATCACT                  | 60      | JN034421         |
|                              | <i>mstn1</i>   | F: GTACGACGTGCTGGGAGACG<br>R: CGTACGATTCGATTTCGTTG                 | 60      | AF258448.1       |
|                              | <i>mstn2</i>   | F: ACCTGGTGAACAAAGCCAAC<br>R: TGCGGTTGAAGTAGAGCATG                 | 60      | AY046314         |
|                              | <i>mhc2a</i>   | F: GCCCATCAACTTCACCGTCTTT<br>R: GGTTGGTCATCTCCTCAGCGG              | 60      | AF150904         |

|                            |                     |                                                              |                                                   |            |
|----------------------------|---------------------|--------------------------------------------------------------|---------------------------------------------------|------------|
|                            | <i>mlc2b</i>        | F: TCCCTTTGCTATTCTGCCTTC<br>R: AAATCAGCCCTATTCCCCATA         | 60                                                | FG618631   |
| <i>Proteolytic systems</i> | <i>capn1</i>        | F: CCTACGAGATGAGGATGGCT<br>R: AGTTGTCAAAGTCGGCGGT            | 56                                                | KF444899   |
|                            | <i>capn2</i>        | F: ACCCACGCTCAGACGGCAAA<br>R: CGTTCCCCTGTCATCCATCA           | 61                                                | KF444900   |
|                            | <i>capn3</i>        | F: AGAGGGTTTCAGCCTTGAGA<br>R: CGCTTTGATCTTTCTCCACA           | 56                                                | ERP000874  |
|                            | <i>capns1a</i>      | F: CGCAGATACAGCGATGAAAA<br>R: GTTTTGAAGGAACGGCACAT           | 56                                                | KF444901   |
|                            | <i>capns1b</i>      | F: ATGGACAGCGACAGCACA<br>R: AGAGGTATTTGAACTCGTGGAAG          | 56                                                | ERP000874  |
|                            | <i>ctnda</i>        | F: CCTCCATTCCTGCTCCTTC<br>R: ACCGGATGGAAAACCTCTGTG           | 56                                                | AF036319   |
|                            | <i>ctsl</i>         | F: ACTCCTTGGGCAAACACA<br>R: CCTTGAACCTTCCTCTCCGT             | 54                                                | DQ875329   |
|                            | <i>ub</i>           | F: ACTGGCAAGACCATTACCTT<br>R: TGGATGTTGTAGTCGGAAAAG          | 54                                                | KJ524459   |
|                            | <i>murfl</i>        | F: GTGACGGCGAGGATGTGC<br>R: CTTCGGCTCCTTGGTGTCTT             | 60                                                | FM145056   |
|                            | <i>mafbx</i>        | F: GGTCACCTGGAGTGGAAAGAA<br>R: GGTGCAACTTTCTGGGTTGT          | 60                                                | ERA047531  |
|                            | <i>n3</i>           | F: AGACACACACTGAACCCGA<br>R: TTCCTGAAGCGAACCAGA              | 54                                                | KJ524458   |
|                            | <i>Bone-related</i> | <i>runx2</i>                                                 | F: ACCCGTCCTACCTGAGTCC<br>R: AGAAGAACCTGGCAATCGTC | 60         |
| <i>fib1a</i>               |                     | F: CGGTAATAACTACAGAATCGGTGAG<br>R: CGCATTGAACTCGCCCTTG       | 60                                                | FG262933   |
| <i>coll1a1</i>             |                     | F: GAGATGGCGGTGATGTGGCGGAGTC<br>R: GCCTGGTTTGGCTGGATGAAGAGGG | 68                                                | DQ324363   |
| <i>ocn</i>                 |                     | F: TCCGCAGTGGTGAGACAGAAG<br>R: CGGTCCGTAGTAGGCCGTGTAG        | 56                                                | AF048703   |
| <i>on</i>                  |                     | F: AGGAGGAGGTCATCGTGGAAGAGCC<br>R: GTGGTGGTTCAGGCAGGGATTCTCA | 68                                                | AY239014   |
| <i>ctsk</i>                |                     | F: AGCGAGCAGAACCTGGTGGAC<br>R: GCAGAGTTGTAGTTGGGGTTCGTAG     | 60                                                | DQ875329   |
| <i>mmp9</i>                |                     | F: ATTCAGAAGGTGGAGGGAGCG<br>R: CATTGGGGACACCACCGAAGA         | 60                                                | AM905938   |
| <i>Reference</i>           | <i>ef1a</i>         | F: CTTCAACGCTCAGGTCATCAT<br>R: GCACAGCGAAACGACCAAGGGGA       | 60                                                | AF184170   |
|                            | <i>rps18</i>        | F: GGGTGTGGCAGACGTTAC<br>R: CTTCTGCCTGTTGAGGAACCA            | 60                                                | AM490061.1 |
|                            | <i>b-actin</i>      | F: TCCTGCGGAATCCATGAGA<br>R: GACGTGCACTTCATGATGCT            | 60                                                | X89920     |
|                            | <i>rpl27</i>        | F: AAGAGGAACACAACCTACTGCCCCAC<br>R: CTTCTGCCTGTTGAGGAACCA    | 68                                                | AY188520   |

**Supplementary Table 2:** Body weight (BW), body length (BL), condition factor (CF), hepatosomatic index (HSI), viscerosomatic index (VSI) and ratio of Gh and Igf1 plasma levels along the fasting and refeeding experiment. Data are shown as means  $\pm$  SEM (n=6). Letters indicate significant differences ( $p < 0.05$ ) by one-way ANOVA, LSD and Tukey HSD test.

|                    | <b>-21 Days</b>         | <b>0h</b>              | <b>2h</b>              | <b>5h</b>               | <b>24h</b>             | <b>7 Days</b>           |
|--------------------|-------------------------|------------------------|------------------------|-------------------------|------------------------|-------------------------|
| <b>BW (g)</b>      | 53,9 $\pm$ 3,0          | 47,2 $\pm$ 3,2         | 49,4 $\pm$ 1,9         | 50,8 $\pm$ 2,3          | 46,8 $\pm$ 1,7         | 54,4 $\pm$ 3,5          |
| <b>BL (cm)</b>     | 12,9 $\pm$ 0,27         | 13,1 $\pm$ 0,34        | 13,1 $\pm$ 0,21        | 13,2 $\pm$ 0,24         | 13,0 $\pm$ 0,18        | 13,4 $\pm$ 0,29         |
| <b>CF</b>          | 2,49 $\pm$ 0,05<br>(A)  | 2,11 $\pm$ 0,06<br>(B) | 2,22 $\pm$ 0,05<br>(B) | 2,23 $\pm$ 0,03<br>(B)  | 2,14 $\pm$ 0,04<br>(B) | 2,27 $\pm$ 0,03<br>(B)  |
| <b>HSI</b>         | 1,27 $\pm$ 0,11<br>(B)  | 0,58 $\pm$ 0,06<br>(C) | 0,58 $\pm$ 0,06<br>(C) | 0,68 $\pm$ 0,06<br>(C)  | 0,81 $\pm$ 0,08<br>(C) | 1,66 $\pm$ 0,1<br>(A)   |
| <b>VSI</b>         | 0,66 $\pm$ 0,13<br>(AB) | 0,36 $\pm$ 0,11<br>(C) | 0,64 $\pm$ 0,13<br>(A) | 0,37 $\pm$ 0,13<br>(AB) | 0,3 $\pm$ 0,09<br>(AB) | 0,55 $\pm$ 0,06<br>(AB) |
| <b>[Gh]/[Igf1]</b> | 0,06 $\pm$ 0,08<br>(B)  | 2,97 $\pm$ 0,80<br>(A) | 3,4 $\pm$ 0,23<br>(A)  | 2,85 $\pm$ 1,13<br>(A)  | 3,24 $\pm$ 1,04<br>(A) | 0,89 $\pm$ 0,48<br>(AB) |

**Supplementary information 3 - Western blot full length gels:** the six samples of each time group were evenly distributed in three gels resulting in 2 samples/gel/group. Due to that in each western blot, different proteins were analyzed, it was necessary to crop the membranes in order to incubate them with different primary antibodies. Tor (289 kDa MW) and Akt (60 kDa MW) phosphorylated and total forms, were analyzed in the same western blot by cutting the membranes in two. The top part was used to blot Tor antibodies and the bottom part for Akt. Phosphorylated forms were analyzed first and after stripping, the corresponding total forms were determined in the same membranes. Moreover, Ctsd (33 kDa MW) and Ctstl (23 kDa MW) were analyzed in cropped membranes of different western blots each along with other proteins that were unsuccessful (data not shown).

Western blot membranes 1, 2 and 3 top: pTor

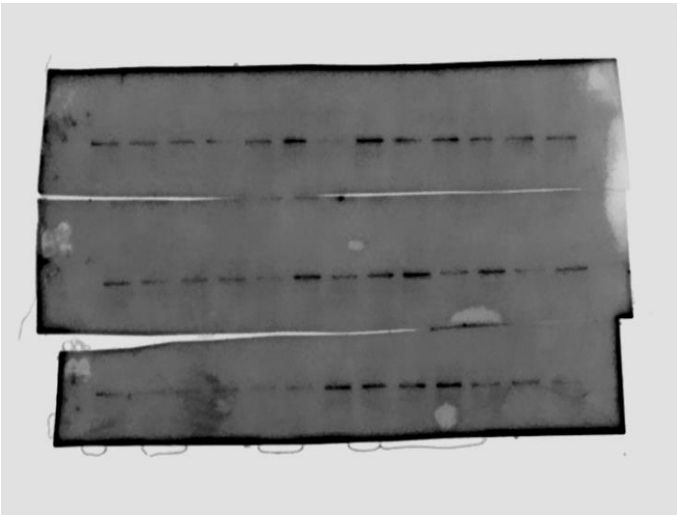

Western blot membranes 1, 2 and 3 top: Total Tor

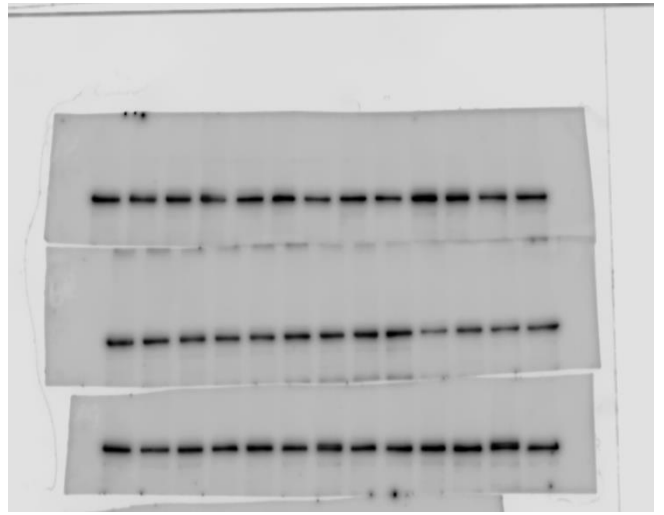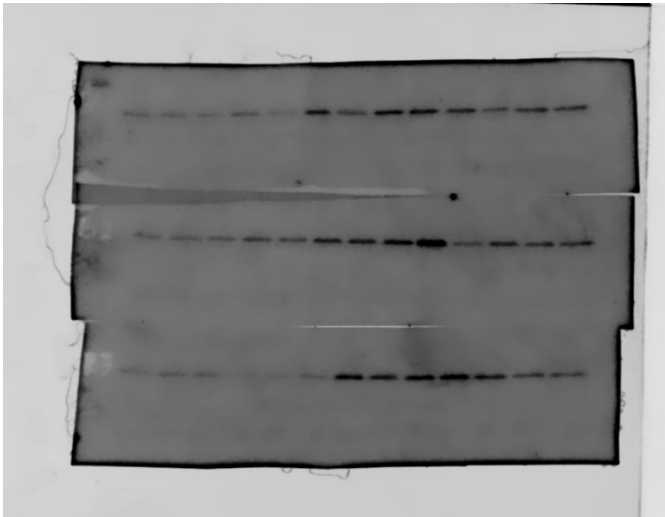

Western blot membranes 1, 2 and 3 bottom: pAkt

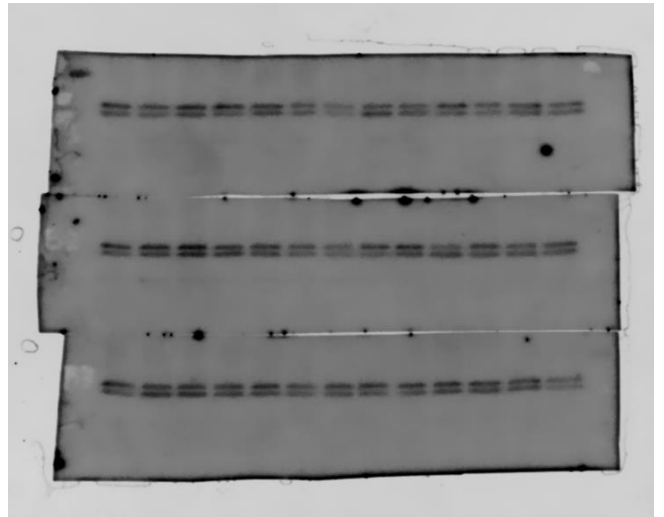

Western blot membranes 1, 2 and 3 bottom: Total Akt

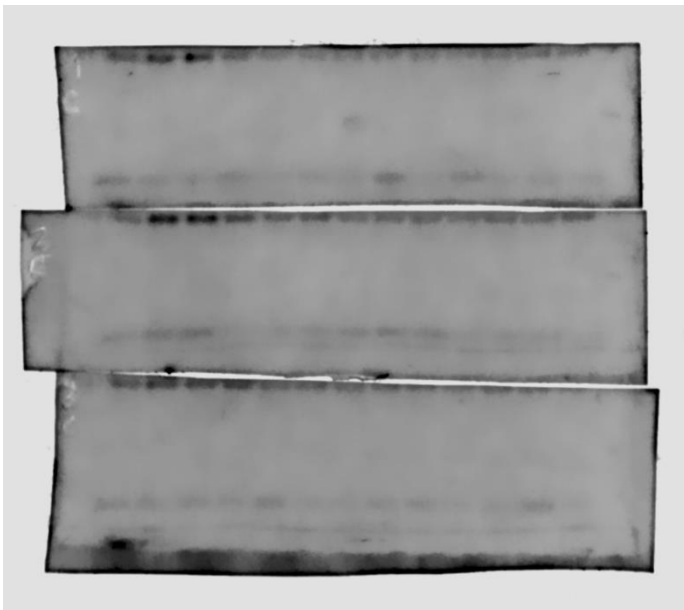

Western blot membranes 4, 5 and 6: Ctcd

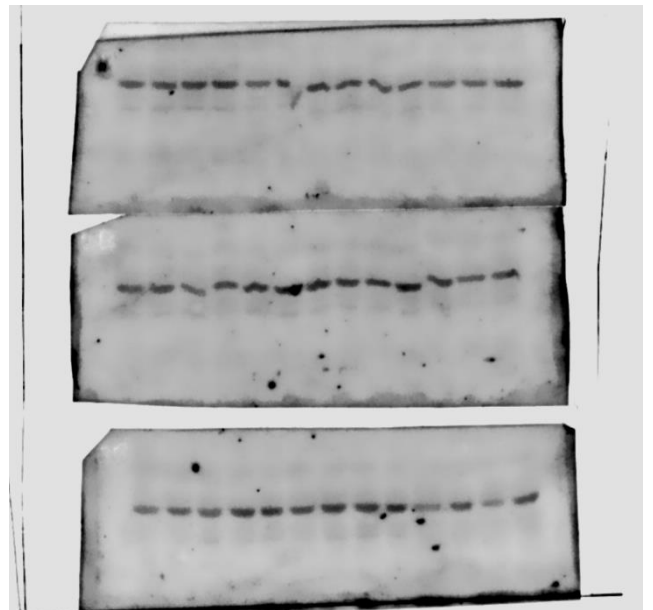

Western blot membranes 7, 8 and 9: Ctsl
